# Supplementary material for: Involvement of loop 5 lysine residues and the N-terminal β-hairpin of the ribotoxin hirsutellin A on its insecticidal activity
Source: publisher site journal article supplement (doi:10.1515/hsz-2015-0261), 2015-11-19
Supplement: Supplementary file 1 [file Olombradaetal_SupplementaryMaterial_BiolCheml.docx]

**Supplementary Material**

**Table S1**. Coding nucleotide 5’→3’ sequences of the primers used to construct the different mutants studied in this work, with nucleotide changes or insertions underlined. These and the corresponding complementary ones were used to obtain each mutation.

| HtA mutant | Nucleotide sequence |
| --- | --- |
| K115E | 5’- ATGACGCACAGCGAGGTCGACAAGAAT -3’ |
| K118E | 5’- ACAGCAAGGTCGACGAGAATAACCAGG-3’ |
| K123E | 5’- AATAACCAGGGCGAGGAGTTCTTTGAG -3’ |
| Δ(8-15) | 5’-GTCACCTGCCGGGGTGGTCCTTTCAAGGTAGACGTG -3’ |
